## **Supplementary Tables (Manuscript Version 2017-07-06)**

Xiang Zhu<sup>1\*</sup>, Matthew Stephens<sup>1,2\*</sup>

**1 Department of Statistics, University of Chicago, Chicago, IL, USA**

**2 Department of Human Genetics, University of Chicago, Chicago, IL, USA**

**\* E-mail:** xiangzhu@uchicago.edu mstephens@uchicago.edu

### **Contents**

|                              |          |
|------------------------------|----------|
| <b>Supplementary Table 1</b> | <b>2</b> |
| <b>Supplementary Table 2</b> | <b>3</b> |
| <b>Supplementary Table 3</b> | <b>4</b> |
| <b>Supplementary Table 4</b> | <b>5</b> |
| <b>References</b>            | <b>5</b> |

## Supplementary Table 1

**Sample sizes and numbers of genetic variants in GWAS of 31 human phenotypes.** For each trait, the number of “total” SNPs is the number of SNPs reported in the corresponding publication and/or summary statistics file, and the number of “analyzed” SNPs is the number of SNPs used in our analyses. Both columns are visualized in **Supplementary Figure 1**.

| Phenotype (abbreviation)            | PMID     | Number of SNPs |           | Sample size<br>(cases+controls) |
|-------------------------------------|----------|----------------|-----------|---------------------------------|
|                                     |          | Total          | Analyzed  |                                 |
| <b>Neurological phenotypes</b>      |          |                |           |                                 |
| Amyotrophic lateral sclerosis (ALS) | 27455348 | 8,709,433      | 1,162,845 | 12,577+23,475                   |
| Depressive symptoms (DS)            | 27089181 | 6,524,474      | 1,119,108 | 161,460                         |
| Alzheimer’s disease (LOAD)          | 24162737 | 7,055,881      | 1,136,997 | 17,008+37,154                   |
| Neuroticism (NEU)                   | 27089181 | 6,524,432      | 1,119,108 | 170,911                         |
| Schizophrenia (SCZ)                 | 25056061 | 9,444,230      | 1,113,442 | 152,805                         |
| <b>Anthropometric traits</b>        |          |                |           |                                 |
| Body mass index (BMI)               | 25673413 | 2,554,637      | 1,012,465 | 234,069                         |
| Height (HEIGHT)                     | 25282103 | 2,550,858      | 1,064,575 | 253,288                         |
| Waist-to-hip ratio (WHR)            | 25673412 | 2,542,431      | 1,008,898 | 142,762                         |
| <b>Immune-related traits</b>        |          |                |           |                                 |
| Crohn’s disease (CD)                | 26192919 | 12,276,505     | 1,064,533 | 5,956+14,927                    |
| Inflammatory bowel disease (IBD)    | 26192919 | 12,716,083     | 1,081,481 | 12,882+21,770                   |
| Rheumatoid arthritis (RA)           | 24390342 | 8,747,962      | 1,158,064 | 14,361+43,923                   |
| Ulcerative colitis (UC)             | 26192919 | 12,255,196     | 1,092,170 | 6,968+20,464                    |
| <b>Metabolic phenotypes</b>         |          |                |           |                                 |
| Age at natural menopause (ANM)      | 26414677 | 2,418,695      | 1,047,412 | 69,360                          |
| Coronary artery disease (CAD)       | 26343387 | 9,455,778      | 1,121,322 | 60,801+123,504                  |
| Fasting glucose (FG)                | 22581228 | 2,628,879      | 1,114,610 | 58,074                          |
| Fasting insulin (FI)                | 22581228 | 2,627,848      | 1,114,592 | 51,750                          |
| Gout (GOUT)                         | 23263486 | 2,538,056      | 1,061,037 | 2,115+67,259                    |
| High-density lipoprotein (HDL)      | 20686565 | 2,692,429      | 1,032,214 | 99,900                          |
| Heart rate (HR)                     | 23583979 | 2,516,789      | 1,066,168 | 92,355                          |
| Low-density lipoprotein (LDL)       | 20686565 | 2,692,564      | 1,030,397 | 95,454                          |
| Myocardial infarction (MI)          | 26343387 | 9,289,491      | 1,111,568 | 42,561+123,504                  |
| Type 2 diabetes (T2D)               | 22885922 | 2,473,441      | 1,047,618 | 12,171+56,862                   |
| Total cholesterol (TC)              | 20686565 | 2,692,413      | 1,032,272 | 100,184                         |
| Triglycerides (TG)                  | 20686565 | 2,692,560      | 1,030,671 | 96,598                          |
| Serum urate (URATE)                 | 23263486 | 2,450,547      | 1,050,253 | 110,347                         |
| <b>Hematopoietic traits</b>         |          |                |           |                                 |
| Haemoglobin (HB)                    | 23222517 | 2,593,078      | 1,116,281 | 61,155                          |
| Mean cell HB (MCH)                  | 23222517 | 2,586,784      | 1,114,901 | 51,711                          |
| Mean cell HB concentration (MCHC)   | 23222517 | 2,588,875      | 1,115,595 | 56,475                          |
| Mean cell volume (MCV)              | 23222517 | 2,591,132      | 1,116,066 | 58,114                          |
| Packed cell volume (PCV)            | 23222517 | 2,591,079      | 1,115,725 | 53,089                          |
| Red blood cell count (RBC)          | 23222517 | 2,589,454      | 1,115,397 | 53,661                          |

## Supplementary Table 2

**Confounding adjustment in GWAS of 31 human phenotypes.** Columns left to right: (1) phenotype and its abbreviation; (2) genomic control (GC) factor [1]; (3) LD score (LDSC) regression intercept [2]; (4) the number of top genotype-derived principal components (PCs) that were included as covariates in the single-SNP association testing [3]; (5) other covariates included in the single-SNP association testing. The genomic control factor  $\lambda_{GC}$  and the LD score regression intercept  $\lambda_{LDSC}$  are two measures of confounding biases such as population stratification. Values of  $\lambda_{GC} \approx 1$  or  $\lambda_{LDSC} \approx 1$  indicate little confounding effects, whereas  $\lambda_{GC} \geq 1$  or  $\lambda_{LDSC} \geq 1$  suggest possible existence of confounding biases. The “cohort” covariate denote all factors that are specific to study cohorts (e.g. genotyping array, study site).

| Phenotype (abbreviation)                   | $\lambda_{GC}$ | $\lambda_{LDSC}$ | # of PCs  | Other covariates      |
|--------------------------------------------|----------------|------------------|-----------|-----------------------|
| <b>Neurological phenotypes</b>             |                |                  |           |                       |
| Amyotrophic lateral sclerosis (ALS)        | 1.12           | 1.10             | 1-4       | not shown             |
| Depressive symptoms (DS)                   | 1.17           | 1.01             | 4-15      | sex, age, cohort      |
| Alzheimer’s disease (LOAD)                 | 1.09           | 1.04             | 2-8       | sex, age              |
| Neuroticism (NEU)                          | 1.32           | 1.00             | 4-15      | sex, age, cohort      |
| Schizophrenia (SCZ)                        | 1.47           | 1.07             | 10        | not shown             |
| <b>Anthropometric traits</b>               |                |                  |           |                       |
| Body mass index (BMI)                      | 1.08           | 1.02             | not shown | sex, age, cohort      |
| Height (HEIGHT)                            | 1.94           | 1.05             | not shown | sex, age, cohort      |
| Waist-to-hip ratio (WHR)                   | 1.01           | 0.93             | not shown | sex, age, cohort, BMI |
| <b>Immune-related traits</b>               |                |                  |           |                       |
| Crohn’s disease (CD)                       | 1.13           | 1.03             | 10        | not shown             |
| Inflammatory bowel disease (IBD)           | 1.16           | 1.06             | 15        | not shown             |
| Rheumatoid arthritis (RA)                  | 1.07           | 0.98             | 5-10      | not shown             |
| Ulcerative colitis (UC)                    | 1.11           | 1.04             | 7         | not shown             |
| <b>Metabolic phenotypes</b>                |                |                  |           |                       |
| Age at natural menopause (ANM)             | not shown      | not shown        | not shown | cohort                |
| Coronary artery disease (CAD)              | 1.18           | 1.05             | not shown | not shown             |
| Fasting glucose (FG)                       | not shown      | not shown        | not shown | sex, age, cohort, BMI |
| Fasting insulin (FI)                       | 1.07           | 1.02             | not shown | sex, age, cohort, BMI |
| Gout (GOUT)                                | 1.03           | not shown        | 2-10      | sex, age, cohort      |
| High-density lipoprotein cholesterol (HDL) | 1.14           | 1.01             | not shown | sex, age, cohort      |
| Heart rate (HR)                            | 1.11           | 1.01             | not shown | sex, age, cohort, BMI |
| Low-density lipoprotein cholesterol (LDL)  | 1.10           | 1.00             | not shown | sex, age, cohort      |
| Myocardial infarction (MI)                 | not shown      | not shown        | not shown | not shown             |
| Type 2 diabetes (T2D)                      | 1.10           | 1.03             | not shown | cohort                |
| Total cholesterol (TC)                     | 1.11           | 1.01             | not shown | sex, age, cohort      |
| Triglycerides (TG)                         | 1.12           | 1.00             | not shown | sex, age, cohort      |
| Serum urate (URATE)                        | 1.12           | 1.01             | 2-10      | sex, age, cohort      |
| <b>Hematopoietic traits</b>                |                |                  |           |                       |
| Haemoglobin (HB)                           | 1.10           | not shown        | 2-10      | sex, age, cohort      |
| Mean cell HB (MCH)                         | 1.13           | not shown        | 2-10      | sex, age, cohort      |
| Mean cell HB concentration (MCHC)          | 1.08           | not shown        | 2-10      | sex, age, cohort      |
| Mean cell volume (MCV)                     | 1.14           | not shown        | 2-10      | sex, age, cohort      |
| Packed cell volume (PCV)                   | 1.10           | not shown        | 2-10      | sex, age, cohort      |
| Red blood cell count (RBC)                 | 1.14           | not shown        | 2-10      | sex, age, cohort      |

### Supplementary Table 3

**Grids of hyper-parameters used in genome-wide multiple-SNP analyses of 31 human phenotypes, assuming no pathways are enriched.**

| Phenotype (abbreviation)            | Round 1 analysis |                    | Round 2 analysis |                     |
|-------------------------------------|------------------|--------------------|------------------|---------------------|
|                                     | $h$              | $\theta_0$         | $h$              | $\theta_0$          |
| <b>Neurological phenotypes</b>      |                  |                    |                  |                     |
| Amyotrophic lateral sclerosis (ALS) | (0.3:0.1:0.6)    | (-6:0.25:-3)       | (0.3:0.1:0.6)    | (-6:0.05:-5)        |
| Depressive symptoms (DS)            | (0.3:0.1:0.6)    | (-6:0.25:-2)       | (0.3:0.1:0.6)    | (-6:0.05:-5)        |
| Alzheimer's disease (LOAD)          | (0.3:0.1:0.6)    | (-5.25:0.25:-3.25) | 0.3              | (-5.25:0.025:-4.75) |
| Neuroticism (NEU)                   | (0.3:0.1:0.6)    | (-4.5:0.25:-2)     | 0.3              | (-4.5:0.025:-4)     |
| Schizophrenia (SCZ)                 | (0.3:0.1:0.6)    | (-4:0.25:-1)       | 0.3              | (-2.25:0.025:-1.75) |
| <b>Anthropometric traits</b>        |                  |                    |                  |                     |
| Body mass index (BMI)               | (0.3:0.1:0.6)    | (-5:0.25:-1)       | 0.3              | (-4.25:0.025:-3.75) |
| Height (HEIGHT)                     | (0.3:0.1:0.6)    | (-4:0.25:-1)       | (0.3:0.1:0.4)    | (-2.25:0.025:-1.75) |
| Waist-to-hip ratio (WHR)            | (0.3:0.1:0.6)    | (-6:0.25:-3)       | (0.3:0.1:0.6)    | (-6:0.05:-5)        |
| <b>Immune-related traits</b>        |                  |                    |                  |                     |
| Crohn's disease (CD)                | (0.3:0.1:0.6)    | (-4:0.25:-2)       | 0.3              | (-3.25:0.025:-2.75) |
| Inflammatory bowel disease (IBD)    | (0.3:0.1:0.6)    | (-4:0.25:-2)       | 0.3              | (-3.25:0.025:-2.75) |
| Rheumatoid arthritis (RA)           | (0.3:0.1:0.6)    | (-4.5:0.25:-2)     | 0.3              | (-3.5:0.025:-3)     |
| Ulcerative colitis (UC)             | (0.3:0.1:0.6)    | (-4:0.25:-2)       | 0.3              | (-3.25:0.025:-2.75) |
| <b>Metabolic phenotypes</b>         |                  |                    |                  |                     |
| Age at natural menopause (ANM)      | (0.3:0.1:0.6)    | (-6:0.25:-2)       | 0.4              | (-5.75:0.025:-5.25) |
| Coronary artery disease (CAD)       | (0.3:0.1:0.6)    | (-5:0.25:-2)       | 0.3              | (-4.25:0.25:-3.75)  |
| Fasting glucose (FG)                | (0.3:0.1:0.6)    | (-6:0.25:-3)       | 0.6              | (-6:0.05:-5)        |
| Fasting insulin (FI)                | (0.3:0.1:0.6)    | (-6:0.25:-3)       | 0.6              | (-6.25:0.025:-5.75) |
| Gout (GOUT)                         | (0.3:0.1:0.6)    | (-5.5:0.25:-2)     | (0.3:0.1:0.6)    | (-5.5:0.05:-4.5)    |
| High-density lipoprotein (HDL)      | (0.3:0.1:0.6)    | (-5:0.25:-2)       | 0.3              | (-3.75:0.025:-3.25) |
| Heart rate (HR)                     | (0.3:0.1:0.6)    | (-5:0.25:-2)       | (0.3:0.1:0.4)    | (-4.5:0.025:-4)     |
| Low-density lipoprotein (LDL)       | (0.3:0.1:0.6)    | (-5:0.25:-2)       | 0.3              | (-4:0.025:-3.5)     |
| Myocardial infarction (MI)          | (0.3:0.1:0.6)    | (-5:0.25:-2)       | 0.3              | (-4.5:0.025:-4)     |
| Type 2 diabetes (T2D)               | (0.3:0.1:0.6)    | (-5:0.25:-2)       | (0.3:0.1:0.6)    | (-4.75:0.025:-4.25) |
| Total cholesterol (TC)              | (0.3:0.1:0.6)    | (-5:0.25:-2)       | 0.6              | (-5:0.025:-4.5)     |
| Triglycerides (TG)                  | (0.3:0.1:0.6)    | (-6:0.25:-3)       | 0.5              | (-6.25:0.025:-5.75) |
| Serum urate (URATE)                 | (0.3:0.1:0.6)    | (-5.5:0.25:-2)     | 0.5              | (-5.5:0.025:-5)     |
| <b>Hematopoietic traits</b>         |                  |                    |                  |                     |
| Haemoglobin (HB)                    | (0.3:0.1:0.6)    | (-6:0.25:-3)       | 0.6              | (-6.25:0.025:-5.75) |
| Mean cell HB (MCH)                  | (0.3:0.1:0.6)    | (-5:0.25:-2)       | 0.6              | (-4.75:0.05:-3.75)  |
| Mean cell HB concentration (MCHC)   | (0.3:0.1:0.6)    | (-6:0.25:-3)       | (0.3:0.1:0.6)    | (-6:0.05:-5)        |
| Mean cell volume (MCV)              | (0.3:0.1:0.6)    | (-5:0.25:-2)       | 0.6              | (-4.25:0.025:-3.75) |
| Packed cell volume (PCV)            | (0.3:0.1:0.6)    | (-5:0.25:-2)       | 0.6              | (-5.25:0.025:-4.75) |
| Red blood cell count (RBC)          | (0.3:0.1:0.6)    | (-5:0.25:-2)       | (0.3:0.1:0.6)    | (-3.75:0.025:-3.25) |

## Supplementary Table 4

**Grids of hyper-parameters used in genome-wide multiple-SNP analyses of 31 human phenotypes, assuming a candidate pathway are enriched.**

| Phenotype (abbreviation)            | Round 1 analysis |                   |                  | Round 2 analysis |                       |               |
|-------------------------------------|------------------|-------------------|------------------|------------------|-----------------------|---------------|
|                                     | $h$              | $\theta_0$        | $\theta$         | $h$              | $\theta_0$            | $\theta$      |
| <b>Neurological phenotypes</b>      |                  |                   |                  |                  |                       |               |
| Amyotrophic lateral sclerosis (ALS) | (0.3:0.1:0.6)    | (-6:0.25:-5)      | (0:0.6:6)        | (0.3:0.1:0.6)    | (-6:0.05:-5)          | (0:0.1:4)     |
| Depressive symptoms (DS)            | (0.3:0.1:0.6)    | (-6:0.25:-5)      | (0:0.6:6)        | (0.3:0.1:0.6)    | (-6:0.05:-5)          | (0:0.15:6)    |
| Alzheimer's disease (LOAD)          | 0.6              | -5                | (0:0.025:5)      | 0.6              | (-5.150:0.025:-5.075) | (0:0.01:4)    |
| Neuroticism (NEU)                   | (0.3:0.1:0.4)    | (-4.5:0.25:-4)    | (0:0.1:4)        | 0.3              | (-4.5:0.025:-4)       | (0:0.037:3.7) |
| Schizophrenia (SCZ)                 | 0.3              | -2                | (0:0.01:2)       | 0.3              | (-2.2:0.025:-2.05)    | (0:0.01:2)    |
| <b>Anthropometric traits</b>        |                  |                   |                  |                  |                       |               |
| Body mass index (BMI)               | 0.3              | -4                | (0:0.02:4)       | 0.3              | (-4.2:0.025:-3.8)     | (0:0.018:3.5) |
| Height (HEIGHT)                     | 0.3              | -2                | (0:0.01:2)       | 0.3              | (-2.075:0.025:-1.925) | (0:0.01:1)    |
| Waist-to-hip ratio (WHR)            | 0.3              | -3                | (0:0.015:3)      | 0.3              | (-3:0.025:-2.95)      | (0:0.01:3)    |
| <b>Immune-related traits</b>        |                  |                   |                  |                  |                       |               |
| Crohn's disease (CD)                | 0.3              | -3                | (0:0.015:3)      | 0.3              | -3                    | (0:0.01:2)    |
| Inflammatory bowel disease (IBD)    | 0.3              | -3                | (0:0.015:3)      | 0.3              | (-3:0.025:-2.8)       | (0:0.02:2)    |
| Rheumatoid arthritis (RA)           | 0.3              | -3.25             | (0:0.016:3.25)   | 0.3              | (-3.25:0.025:-3.175)  | (0:0.01:2)    |
| Ulcerative colitis (UC)             | 0.3              | -3                | (0:0.015:3)      | 0.3              | (-3.175:0.025:-2.775) | (0:0.025:2.5) |
| <b>Metabolic phenotypes</b>         |                  |                   |                  |                  |                       |               |
| Age at natural menopause (ANM)      | 0.4              | -5.5              | (0:0.028:5.5)    | 0.4              | (-5.75:0.025:-5.7)    | (0:0.04:4.5)  |
| Coronary artery disease (CAD)       | 0.3              | -4                | (0:0.02:4)       | 0.3              | (-4.025:0.025:-3.775) | (0:0.035:3.5) |
| Fasting glucose (FG)                | 0.6              | -5.25             | (0:0.026:5.25)   | 0.6              | (-6:0.05:-5.75)       | (0:1:0.1:4.5) |
| Fasting insulin (FI)                | 0.6              | -6                | (0:0.03:6)       | 0.6              | (-6.25:0.025:-6)      | (0:0.019:3.8) |
| Gout (GOUT)                         | (0.3:0.1:0.6)    | (-5.5:0.25:-4.75) | (0:0.46:5.5)     | (0.3:0.1:0.6)    | (-5.5:0.05:-4.6)      | (0:0.1:5)     |
| High-density lipoprotein (HDL)      | 0.3              | -3.5              | (0:0.018:3.5)    | 0.3              | (-3.575:0.025:-3.5)   | (0:0.01:3)    |
| Heart rate (HR)                     | (0.3:0.1:0.4)    | (-4.5:0.25:-4.25) | (0:(4.5/50):4.5) | (0.3:0.1:0.4)    | (-4.5:0.025:-4.1)     | (0:0.038:3.8) |
| Low-density lipoprotein (LDL)       | 0.3              | -3.75             | (0:0.019:3.75)   | 0.3              | (-3.625:0.025:-3.55)  | (0:0.01:3)    |
| Myocardial infarction (MI)          | 0.3              | (-4.5:0.25:-4)    | (0:0.067:4.5)    | 0.3              | (-4.475:0.025:-4)     | (0:0.045:4.5) |
| Type 2 diabetes (T2D)               | (0.4:0.1:0.6)    | -4.5              | (0:0.067:4.5)    | (0.3:0.1:0.6)    | (-4.75:0.025:-4.35)   | (0:0.3:3)     |
| Total cholesterol (TC)              | 0.6              | -4.75             | (0:0.024:4.75)   | 0.6              | (-4.8:0.025:-4.55)    | (0:0.02:4)    |
| Triglycerides (TG)                  | 0.5              | -4                | (0:0.03:4)       | 0.5              | (-6.25:0.025:-6.1)    | (0:0.02:5.2)  |
| Serum urate (URATE)                 | 0.5              | -5.25             | (0:0.026:5.25)   | 0.5              | (-5.4:0.025:-5)       | (0:0.1:4.7)   |
| <b>Hematopoietic traits</b>         |                  |                   |                  |                  |                       |               |
| Haemoglobin (HB)                    | 0.6              | -6                | (0:0.03:6)       | 0.6              | (-6.25:0.025:-5.9)    | (0:0.04:4.4)  |
| Mean cell HB (MCH)                  | 0.6              | -4                | (0:0.02:4)       | 0.6              | (-4.7:0.05:-4.35)     | (0:0.015:3)   |
| Mean cell HB concentration (MCHC)   | (0.3:0.1:0.6)    | (-6:0.25:-5.25)   | (0:0.5:6)        | (0.3:0.1:0.6)    | (-6:0.05:-5)          | (0:0.1:5)     |
| Mean cell volume (MCV)              | 0.6              | -4                | (0:0.02:4)       | 0.6              | (-4.225:0.025:-4.125) | (0:0.02:3)    |
| Packed cell volume (PCV)            | 0.6              | -5                | (0:0.025:5)      | 0.6              | (-5.25:0.025:-5.15)   | (0:0.02:4.5)  |
| Red blood cell count (RBC)          | (0.3:0.1:0.6)    | -3.5              | (0:0.07:3.5)     | (0.5:0.1:0.6)    | (-3.7:0.025:-3.6)     | (0:0.035:3.5) |

## References

1. Devlin B, Roeder K (1999) Genomic control for association studies. *Biometrics* 55: 997–1004.
2. Bulik-Sullivan BK, Loh P-R, Finucane HK, Ripke S, Yang J, et al. (2015) LD score regression distinguishes confounding from polygenicity in genome-wide association studies. *Nature Genetics* 47: 291–295.
3. Price AL, Patterson NJ, Plenge RM, Weinblatt ME, Shadick NA, et al. (2006) Principal components analysis corrects for stratification in genome-wide association studies. *Nature Genetics* 38: 904–909.
